# Supplementary material for: Forensic Assessment of Textile Fibers Using Micro FTIR-ATR Spectroscopy
Source: Preprints.org preprint supplement (doi:10.20944/preprints202305.1640.v1), 2023-05-23
Supplement: Supplementary file 1 [file supplementary]

## Sheet: Fibers average
Number	Wave number cm-1	3997.31	3995.25	3993.19	3991.13	3989.07	3987.01	3984.95	3982.89	3980.83	3978.77	3976.71	3974.65	3972.59	3970.52	3968.46	3966.4	3964.34	3962.28	3960.22	3958.16	3956.1	3954.04	3951.98	3949.92	3947.86	3945.8	3943.74	3941.68	3939.62	3937.56	3935.5	3933.44	3931.38	3929.32	3927.25	3925.19	3923.13	3921.07	3919.01	3916.95	3914.89	3912.83	3910.77	3908.71	3906.65	3904.59	3902.53	3900.47
1	Fiber average	0.001345	0.001531	0.00159923	0.00203875	0.00259	0.00263273	0.0017425	0.00094	0.00110556	0.001809	0.00189	0.00178769	0.00213727	0.00181308	0.00164909	0.00118286	0.0006825	0.0011125	0.00208	0.00191333	0.001463	0.00174846	0.0019975	0.00221	0.00233643	0.00173273	0.0013825	0.00121444	0.00155778	0.00171364	0.001933	0.00165	0.00249467	0.00271111	0.00261786	0.00134	0.00138667	0.001212	0.00156545	0.0020975	0.00185583	0.00168308	0.00203071	0.00184286	0.0018425	0.0015825	0.00217125	0.00314733
2	Fiber average	0.00268167	0.00265083	0.00255786	0.00278812	0.00293467	0.00294273	0.0028675	0.00243889	0.002808	0.00275857	0.00303385	0.00339	0.00258714	0.00249333	0.00244462	0.002261	0.00203444	0.00218	0.00244273	0.00197	0.00215455	0.00236571	0.0029625	0.00342533	0.00292643	0.00221	0.00192222	0.0024	0.00262818	0.00265083	0.003023	0.00272667	0.00365385	0.00429846	0.00366929	0.00298818	0.00242625	0.002608	0.00340083	0.004233	0.00352455	0.00341455	0.00302786	0.00343462	0.00321182	0.00281	0.003395	0.00388357
3	Fiber average	0.001348	0.00151111	0.00211	0.00266583	0.00241714	0.00270667	0.00227286	0.0026975	0.00202429	0.00189	0.002042	0.00270857	0.0025	0.00260125	0.00302833	0.002468	0.001514	0.00216333	0.001594	0.002054	0.00168	0.00239286	0.00250182	0.00284917	0.002369	0.001852	0.001678	0.00200833	0.00257333	0.00221857	0.00136625	0.00125286	0.00214429	0.00198818	0.00172545	0.001605	0.0011375	0.00132167	0.00265143	0.00254889	0.00205111	0.00200875	0.001969	0.001939	0.00184	0.00158667	0.00218833	0.0028425
4	Fiber average	0.00242	0.00202	0.00113667	0.00121333	0.001575	0.00164833	0.00114	0.000893333	0.00172	0.0042	0.002145	0.0015325	0.00109	0.0013775	0.001234	0.00201	0.00331	0.00378	0.001715	0.001425	0.001635	0.001565	0.0024125	0.00293667	0.00153	0.001575	0.00114	0.001905	0.00247	0.00285667	0.00362	0.00312	0.00241333	0.002162	0.0018075	0.00254	0.00102	0.0023	0.00258	0.001565	0.00415	0.00242	0.00127	0.00234	0.00468	0.00453	0.00303	0.00244
5	Fiber average	0	0	5e-05	0.00061	0.000585	0	0	0	0	0	0.00106	0.00143	0.00119	0	0	0	0	0	0	0	0	0.00145	0.002045	0.00196	0.00151	0.00193	7e-05	0	0	0	0	0.000185	0.0011625	0.002885	0.00093	0	0	0	0	0.000255	0.00087	0.00059	0.00078	0.00068	0.0005	0	0.00138	0.00116
6	Fiber average	0.00169	0.000765	0.00075	0.00055	0.000803333	0.0003	0	0	0	0	0	0.00022	2e-05	0.00211	0.00291	0	0	0	0	0	0	0.00018	0.000775	0.00229	0.00112	0	0	0	3e-05	0.00037	0.00027	0.00057	0.00016	0.000925	0.00048	0	0	0	0	0.00019	0	0	0	0	0	0	0	0.00161
7	Fiber average	0.001965	0.001436	0.00175333	0.00192286	0.001497	0.00189	0.002012	0.00236	0.002495	0.002332	0.00161714	0.00187429	0.00231833	0.00318	0.0023125	0.00201333	0.00222	0.00272333	0.00216	0.0020625	0.00187	0.002225	0.0021475	0.00203222	0.002535	0.003135	0.0021875	0.0023425	0.0026	0.00249667	0.002245	0.00195	0.00208714	0.00238143	0.00221667	0.001875	0.00415	0.00186	0.0033025	0.00240333	0.00206167	0.00185	0.00195833	0.00349333	0.00265	0.00312	0.004625	0.0035725
8	Fiber average	0.00270733	0.00270267	0.002984	0.00332353	0.003345	0.00273111	0.00254769	0.00233833	0.00317333	0.003232	0.00324933	0.00269937	0.002645	0.00304812	0.00321067	0.00237786	0.00218	0.00232833	0.002455	0.00242833	0.00277917	0.002838	0.00306	0.00329167	0.00329125	0.002614	0.0024	0.0024275	0.00262357	0.00274375	0.00329231	0.0030325	0.00276462	0.00278813	0.00282875	0.002894	0.002445	0.0022625	0.0028025	0.00292813	0.00294133	0.00353154	0.00321333	0.00296786	0.00336	0.00257375	0.00343556	0.00404455
9	Fiber average	0.00428	0.00450923	0.00474769	0.00474929	0.00471286	0.00426692	0.00391818	0.00336182	0.00348273	0.00345083	0.00327385	0.00351846	0.00418083	0.00438	0.00389	0.003135	0.00240909	0.0027	0.00319091	0.00384364	0.00385833	0.00457917	0.00450857	0.00507769	0.00436071	0.00365538	0.00297917	0.003447	0.00331333	0.00372333	0.00406583	0.00436333	0.00413571	0.00447143	0.00417071	0.00354545	0.002727	0.00432778	0.00476364	0.00472917	0.00449917	0.004505	0.00456154	0.00424385	0.003561	0.00268286	0.00319625	0.003215
10	Fiber average	0.003306	0.003453	0.00394	0.00334333	0.00372929	0.00322385	0.00384875	0.00293667	0.00294273	0.00362273	0.00298308	0.00257143	0.00308538	0.00361667	0.00303818	0.002425	0.003756	0.00300125	0.00300333	0.00246273	0.00259083	0.00318923	0.003634	0.00466077	0.00433583	0.003338	0.0029775	0.00286444	0.003094	0.00256357	0.003265	0.00356167	0.00355786	0.00347143	0.00300308	0.00287375	0.00258571	0.00406714	0.003405	0.00301769	0.00271917	0.00301455	0.00347083	0.00314923	0.00305	0.00333167	0.00252182	0.00357
11	Fiber average	0.00491	0.00524462	0.00504133	0.005525	0.00564625	0.00511125	0.004672	0.00494692	0.00502429	0.00546571	0.00502	0.00503667	0.00519933	0.00561714	0.00549714	0.00473286	0.00385286	0.00367143	0.00405857	0.00447	0.00488429	0.00541133	0.00585187	0.00591438	0.00560733	0.00513769	0.00389286	0.00397929	0.00466143	0.00538429	0.00516333	0.00540571	0.005472	0.005565	0.005672	0.00436786	0.00334615	0.003945	0.00494714	0.00460071	0.00477538	0.00523143	0.00525438	0.00562786	0.00387357	0.00224923	0.00311167	0.00345437
12	Fiber average	0.00444	0.00163667	0.00227	0.00173667	0.001778	0.00217	0.00229	0.001374	0.00112833	0.000827143	0.0013025	0.00106	0.00151	0.00158	0.001234	0.00353	0.00183	0.00083	0.00141	0.00103	0.00138333	0.00185	0.0020475	0.00185333	0.00139667	0.0018175	0.0014025	0.0010675	0.00189667	0.00208333	0.00253	0.00173667	0.00132	0.00193154	0.00163538	0.0020325	0.002555	0.00244	0.001744	0.0026575	0.0024875	0.00149	0.00221667	0.002606	0.0013975	0.00155667	0.00239571	0.00266556
13	Fiber average	0.00207	0.00118111	0.00166625	0.0023175	0.0023	0.00287667	0.00291929	0.00284	0.00215	0.00222	0.00231357	0.002883	0.00303091	0.00311571	0.00307813	0.00299429	0.002718	0.002173	0.002077	0.002188	0.0019925	0.00206857	0.00224357	0.00242909	0.00201	0.00183182	0.00152333	0.000838	0.00121	0.00205	0.00181	0.001886	0.0014	0.001653	0.002275	0.00208923	0.002331	0.0029	0.00278667	0.003098	0.00245167	0.00192667	0.00126667	0.00140429	0.002383	0.00330429	0.00356692	0.00217889
14	Fiber average	0.00017	6e-05	0.00055	0.000488	0.000862	0.00129	0.00166	0.00153	0.0022775	0.00214	0.0018	0.001468	0.0019825	0.00171714	0.00200375	0.00221	0.00136	0.00114833	0.00103	0.00115	0.00149	0.001582	0.00158167	0.00125	0.001462	0.001824	0.001815	0.00129	0.00099	0.001	0.00175	0.0011125	0.001774	0.001822	0.0018125	0.00167	0.00153	0.00102	0.00101333	0.00119	0.00139	0.00106	0.00015	0.000946667	0.002138	0.0026575	0.0029	0.0016775
15	Fiber average	0.161284	0.161446	0.134833	0.16237	0.163212	0.163822	0.163738	0.136037	0.16259	0.162988	0.136007	0.13542	0.135552	0.102655	0.117737	0.136718	0.162936	0.162342	0.162186	0.16244	0.163024	0.163546	0.163626	0.136067	0.1355	0.161764	0.160558	0.159298	0.159148	0.159994	0.160646	0.16115	0.161876	0.162106	0.161988	0.161802	0.161066	0.160714	0.16173	0.16321	0.16327	0.1619	0.160648	0.160892	0.162518	0.137243	0.137378	0.162702
16	Fiber average	0.162504	0.162385	0.162874	0.163757	0.164332	0.164641	0.16483	0.164494	0.164217	0.164774	0.165257	0.165322	0.165768	0.166344	0.166324	0.16545	0.164215	0.163516	0.163369	0.16354	0.164066	0.164642	0.165131	0.165427	0.16507	0.164254	0.163568	0.162644	0.162002	0.162339	0.162671	0.162854	0.163627	0.164253	0.164421	0.164763	0.164736	0.164319	0.164704	0.165643	0.165347	0.163621	0.162209	0.162599	0.164544	0.166584	0.166015	0.163464
17	Fiber average	0.158534	0.158435	0.158903	0.159717	0.160346	0.160777	0.160969	0.160652	0.160471	0.160926	0.161125	0.160993	0.161301	0.161891	0.162171	0.161721	0.160947	0.160502	0.160249	0.160077	0.160187	0.160615	0.161251	0.161607	0.161309	0.160796	0.160176	0.158844	0.157833	0.158112	0.15871	0.159304	0.160069	0.16048	0.160683	0.16099	0.160954	0.160576	0.160704	0.161394	0.161228	0.159649	0.158214	0.158434	0.160144	0.162384	0.162561	0.160134
18	Fiber average	0.161101	0.160874	0.16105	0.161683	0.162353	0.162759	0.162646	0.162047	0.161896	0.162535	0.162811	0.162539	0.1627	0.163375	0.16383	0.163368	0.162263	0.161466	0.161346	0.161682	0.162183	0.162565	0.162647	0.162181	0.161356	0.160793	0.160121	0.159069	0.158783	0.159507	0.159982	0.159923	0.160219	0.160926	0.161228	0.160874	0.160231	0.159898	0.160233	0.161224	0.161633	0.160758	0.15991	0.160113	0.160437	0.1598	0.157936	0.156016
19	Fiber average	0.155274	0.155144	0.155672	0.156416	0.15694	0.157511	0.157789	0.157277	0.157008	0.157651	0.157705	0.156969	0.15695	0.157643	0.158319	0.158342	0.157313	0.156152	0.15584	0.156004	0.156282	0.156586	0.156404	0.155546	0.154988	0.15497	0.154311	0.153243	0.153265	0.154124	0.15426	0.153448	0.153156	0.154043	0.154651	0.154167	0.15362	0.153663	0.153743	0.154488	0.155729	0.155714	0.154927	0.15454	0.153696	0.151482	0.149188	0.148194
20	Fiber average	0.156391	0.156318	0.156919	0.157796	0.158236	0.158449	0.158621	0.1584	0.158256	0.158578	0.158419	0.157916	0.158296	0.159309	0.159945	0.159537	0.158179	0.157055	0.157029	0.157659	0.15836	0.158856	0.158765	0.157963	0.157239	0.156906	0.156289	0.155365	0.155173	0.155904	0.156234	0.155813	0.155822	0.156472	0.156835	0.156667	0.156267	0.156057	0.156406	0.157521	0.158311	0.157629	0.156378	0.155982	0.155986	0.155138	0.153348	0.151626
21	Fiber average	0.155813	0.155991	0.156483	0.157199	0.157744	0.158039	0.158287	0.158234	0.15811	0.158484	0.15886	0.15902	0.159389	0.159781	0.159762	0.159013	0.158099	0.157954	0.158139	0.15817	0.158319	0.158743	0.159624	0.160611	0.160561	0.159684	0.159168	0.158061	0.156617	0.156499	0.157354	0.159183	0.161233	0.161085	0.160375	0.161111	0.161329	0.160484	0.16093	0.161869	0.160373	0.157469	0.15593	0.156981	0.160527	0.165298	0.166763	0.164087
22	Fiber average	0.158257	0.158368	0.158847	0.159563	0.160098	0.160477	0.160743	0.1605	0.160301	0.160836	0.161321	0.161393	0.16146	0.161548	0.161526	0.160971	0.160054	0.159593	0.159442	0.15949	0.160076	0.160829	0.161261	0.16126	0.161003	0.160756	0.160424	0.159267	0.158143	0.158172	0.158552	0.159289	0.160544	0.161034	0.161009	0.161312	0.161084	0.160531	0.161038	0.161731	0.160888	0.159079	0.157904	0.158507	0.160807	0.16368	0.164049	0.161421
23	Fiber average	0.1563	0.156189	0.156685	0.15744	0.157966	0.158384	0.158519	0.158034	0.157714	0.158129	0.158194	0.15779	0.158165	0.159194	0.159921	0.159629	0.158371	0.157292	0.157088	0.157309	0.157692	0.158111	0.158061	0.157453	0.157015	0.156712	0.155758	0.154663	0.154801	0.155789	0.15606	0.155433	0.155094	0.155599	0.156151	0.155968	0.155442	0.155297	0.155472	0.156266	0.157136	0.156813	0.155959	0.155639	0.155191	0.153773	0.151709	0.150228
24	Fiber average	0.15871	0.158723	0.159008	0.159473	0.159854	0.160311	0.16063	0.160363	0.160085	0.160443	0.16075	0.160815	0.161099	0.161473	0.161706	0.161358	0.160564	0.160121	0.159899	0.159761	0.160084	0.16062	0.160907	0.160691	0.160217	0.159806	0.159164	0.158125	0.157815	0.158519	0.158924	0.158949	0.159291	0.159483	0.159405	0.159495	0.15945	0.159219	0.159601	0.160577	0.160604	0.159274	0.158039	0.158001	0.15863	0.158977	0.158375	0.15704
25	Fiber average	0.16618	0.166447	0.166768	0.16729	0.167646	0.167733	0.167857	0.16772	0.167656	0.168294	0.168939	0.169356	0.169981	0.170309	0.169958	0.16903	0.16818	0.168159	0.168164	0.167829	0.168014	0.16883	0.169946	0.17085	0.17057	0.169489	0.168843	0.167568	0.166154	0.166367	0.167427	0.169129	0.171076	0.171108	0.170469	0.170981	0.170809	0.169804	0.170535	0.171702	0.17017	0.167291	0.165579	0.166351	0.169988	0.17537	0.177426	0.174795
26	Fiber average	0.165914	0.165586	0.165918	0.166734	0.16721	0.167493	0.167774	0.167619	0.167411	0.167646	0.167862	0.167946	0.168266	0.168753	0.168986	0.168445	0.167368	0.166766	0.166746	0.16693	0.167326	0.167877	0.168721	0.169489	0.169037	0.167783	0.16687	0.165713	0.164881	0.165306	0.166069	0.167076	0.16832	0.168373	0.167999	0.168539	0.168703	0.168064	0.168307	0.169028	0.168281	0.166309	0.164993	0.165771	0.168437	0.17148	0.171586	0.168788
27	Fiber average	0.163309	0.163404	0.16398	0.16497	0.165666	0.165762	0.165706	0.165391	0.165148	0.165666	0.166323	0.16656	0.166785	0.167169	0.167345	0.166858	0.165946	0.165363	0.165069	0.165029	0.165505	0.166171	0.16685	0.167442	0.16717	0.166263	0.165866	0.165016	0.163761	0.163717	0.164395	0.165639	0.167321	0.167633	0.167309	0.167779	0.167642	0.166841	0.167538	0.168866	0.167799	0.164993	0.163147	0.163827	0.167067	0.171564	0.172887	0.170092
28	Fiber average	0.160737	0.160871	0.161215	0.161826	0.162278	0.162576	0.162778	0.162477	0.16225	0.162859	0.163597	0.163873	0.16403	0.164242	0.164203	0.163428	0.162441	0.162307	0.162508	0.16244	0.162559	0.163094	0.163968	0.164621	0.164276	0.163465	0.163049	0.161952	0.160547	0.160476	0.161216	0.162463	0.163997	0.164306	0.16402	0.164509	0.164614	0.163874	0.164029	0.164639	0.163625	0.161589	0.160376	0.161073	0.16396	0.168114	0.169271	0.16634
29	Fiber average	0.157117	0.157083	0.157749	0.158768	0.159317	0.159502	0.159729	0.159603	0.159378	0.159703	0.159956	0.159905	0.160203	0.160766	0.161063	0.160666	0.159849	0.159387	0.159139	0.158993	0.15928	0.159705	0.160134	0.160548	0.160388	0.159865	0.159509	0.158252	0.156857	0.157003	0.157786	0.158847	0.160206	0.16041	0.160124	0.160547	0.160335	0.159424	0.159837	0.161034	0.160567	0.158677	0.157279	0.157659	0.159954	0.163093	0.163709	0.161434
30	Fiber average	0.157255	0.157432	0.15811	0.15904	0.159669	0.159906	0.160064	0.159873	0.159711	0.16018	0.160589	0.160654	0.160892	0.161303	0.161438	0.160904	0.16001	0.159449	0.159208	0.1592	0.159539	0.160021	0.160473	0.16075	0.160562	0.160105	0.159708	0.158525	0.157361	0.157448	0.157969	0.158947	0.16027	0.160456	0.160321	0.160954	0.160946	0.160215	0.160606	0.161543	0.160862	0.158938	0.157566	0.157976	0.160313	0.163362	0.163716	0.16125
31	Fiber average	0.00279429	0.00219	0.00188667	0.002014	0.001492	0.00147444	0.00211667	0.0024425	0.00249625	0.00237625	0.00204625	0.00223571	0.00267125	0.00319	0.00313889	0.00253778	0.00257375	0.00229778	0.00210222	0.00202125	0.0019825	0.00231143	0.002535	0.00335222	0.00390667	0.00369125	0.00287125	0.00286286	0.00217429	0.00141571	0.00181143	0.00290222	0.00329273	0.003382	0.002909	0.00342625	0.00336	0.00329667	0.003721	0.00442333	0.00389667	0.00282444	0.00238875	0.00187444	0.00163556	0.00198667	0.00263182	0.00348818
32	Fiber average	0													3e-05	0.000185	0.00067	0.00035					6e-05	0.000435	0.0008375	0.00077	0.00088						0.00082	0.000838	0.00135	0.00187	0.00106	0.00034	0.000825	0.00119	0.000985714	0.0009675	0.00145	0.00019	0.00015	0.00064	0.00141	0.00184	0.00130667
33	Fiber average	0.0034525	0.0035805	0.00345158	0.00288875	0.00292429	0.003	0.00336368	0.00364706	0.00361222	0.00348263	0.00300263	0.00306353	0.00378941	0.00435684	0.00394227	0.00389571	0.00379476	0.003851	0.00349158	0.00329765	0.00335412	0.00362059	0.00408889	0.0045181	0.00433167	0.00398591	0.0035755	0.0034975	0.00321737	0.00285941	0.00312235	0.00410474	0.00449667	0.00384136	0.00360762	0.003602	0.00374474	0.004163	0.004715	0.00467625	0.00447913	0.0039419	0.003525	0.00328941	0.00317706	0.00345882	0.00410316	0.00477714
34	Fiber average	0.00722	0.00760667	0.00746333	0.00631667	0.008935	0.00660667	0.00701	0.00682	0.00714	0.00723	0.00665333	0.00635667	0.00701667	0.00794	0.00843667	0.00843667	0.00779	0.00710333	0.00664667	0.00630333	0.009415	0.009805	0.0107	0.00586	0.00798	0.00759333	0.00745667	0.00757667	0.00699667	0.00938	0.009585	0.01033	0.00679333	0.00661	0.00707333	0.00718667	0.0067	0.00654667	0.00712	0.00802333	0.00843333	0.00796	0.00760333	0.00749	0.00655333	0.008	0.008375	0.0068
35	Fiber average	0.00382	0.00416714	0.00382857	0.004042	0.00354	0.00353	0.00395333	0.00382833	0.00400667	0.00359143	0.00381833	0.00356333	0.00424833	0.00468	0.00509286	0.00465857	0.00425857	0.00426714	0.00395286	0.00423167	0.00438333	0.004605	0.005055	0.0043825	0.00456625	0.005345	0.00473833	0.0047	0.0043	0.004158	0.004006	0.00346375	0.0044425	0.00407125	0.00396857	0.00392571	0.00367875	0.00457714	0.0045875	0.00488875	0.004645	0.00457857	0.00464167	0.00350286	0.00407	0.003922	0.00377	0.00500143
36	Fiber average												0.00017	0.00159	0.00213	0.00171	0.00093	0.00061	0.00078	0.00014					0.000375	0.00084	0.00079	0.001	0.00132	0.0002					6e-05	0.0011	0.00176	0.00145	0.00087	0.00104	0.00193	0.00267	0.00224	0.00125	0.0003				0.00171
37	Fiber average	0.0018	0.002145	0.00188	0.00205	0.00174	0.00258	0.00111667	0.000753333	0.00069	0.000893333	0.0014	0.00133	0.00179	0.0015975	0.00241333	0.00206667	0.00204	0.00246	0.0021	0.001825	0.00228	0.00198	0.00136	0.00130143	0.0014275	0.00123833	0.00167333	0.00152	0.00215	0.00059	0.0008	0.0013125	0.00178167	0.00230667	0.00198	0.002065	0.00224	0.001195	0.001345	0.00151091	0.00177857	0.001278	0.00134	0.00249	0.001465	0.00258	0.00171625	0.001979
38	Fiber average																									0.00024																							0.00066
39	Fiber average																																								0.000485	0.00013						0.000382	0.00109333
40	Fiber average	0.00286889	0.00370778	0.00397889	0.00319111	0.00262	0.00296444	0.00311111	0.00297	0.00326111	0.00343778	0.00387	0.00373556	0.00454556	0.00542667	0.00509556	0.00400111	0.00385	0.00453667	0.00432333	0.00355111	0.00351111	0.00388556	0.00497667	0.006163	0.00632364	0.00646333	0.00586778	0.00569333	0.00446778	0.00314556	0.00344667	0.00588444	0.00668545	0.00717889	0.00600111	0.005813	0.006311	0.00706889	0.00807222	0.0067075	0.006678	0.00503222	0.00352667	0.00338444	0.00465444	0.0060875	0.00775	0.00638722
41	Fiber average	0.0260674	0.0264789	0.0264281	0.0256737	0.0252878	0.0256711	0.0257959	0.0256041	0.025773	0.0259763	0.0261989	0.0266707	0.0273419	0.0279426	0.0277633	0.027243	0.0274581	0.0282641	0.0280756	0.027057	0.0266211	0.0266811	0.0277307	0.0299774	0.0310344	0.029873	0.0291393	0.0289122	0.0275574	0.0260496	0.0261548	0.028637	0.0310444	0.0303085	0.02883	0.0291089	0.0297437	0.0299563	0.0311244	0.0321111	0.03091	0.0284456	0.0266937	0.0263089	0.0274744	0.0308359	0.0345522	0.0355607
42	Fiber average	0.0863641	0.0868093	0.0870296	0.0864259	0.0893035	0.0896254	0.08647	0.0897354	0.0900023	0.0901665	0.0902546	0.0904912	0.0877107	0.0884793	0.0884189	0.0877985	0.087703	0.0881596	0.0880393	0.0907873	0.087107	0.0870137	0.0878259	0.0899041	0.091037	0.0899907	0.0891611	0.0889185	0.0877522	0.0864733	0.0867437	0.089187	0.0914089	0.090557	0.0890589	0.0893085	0.0898678	0.0899056	0.0908107	0.0915944	0.090533	0.0885152	0.0870874	0.0866293	0.0873326	0.0899152	0.0930089	0.094193
43	Fiber average	0.0340407	0.0345381	0.0345222	0.0349458	0.0358128	0.0336278	0.0339396	0.0339567	0.034263	0.0343144	0.0341715	0.0344167	0.0352174	0.0361052	0.036103	0.0354807	0.0352752	0.0357159	0.0356696	0.0350348	0.034733	0.0345748	0.0351319	0.0369259	0.0380215	0.037087	0.0363681	0.0363656	0.0353574	0.0339711	0.0340044	0.0359626	0.0376241	0.0369515	0.0358252	0.0359948	0.0365478	0.0368144	0.0377933	0.0386207	0.0377415	0.0358511	0.0344981	0.0340052	0.0341878	0.0355585	0.037673	0.0391604
44	Fiber average	0.0430719	0.0435427	0.0435265	0.0482387	0.0500341	0.0463858	0.0447528	0.0464846	0.046785	0.047005	0.046905	0.0449788	0.0453776	0.0427993	0.0430037	0.0441881	0.0440062	0.04435	0.04412	0.0450696	0.0446268	0.0462879	0.0450388	0.0451869	0.0447537	0.0440378	0.0449665	0.0447858	0.0437765	0.0480835	0.0503359	0.0444238	0.0442652	0.0437111	0.0428711	0.0431559	0.0453277	0.045515	0.04459	0.0453048	0.0445793	0.0445558	0.0433415	0.0428485	0.0444944	0.0454404	0.0456485	0.04546
45	Fiber average	0.158125	0.158522	0.158498	0.157729	0.157277	0.157624	0.157756	0.15766	0.157937	0.158033	0.158003	0.158292	0.158993	0.159787	0.159734	0.15907	0.158877	0.159409	0.159384	0.158639	0.158223	0.158157	0.159125	0.161329	0.162489	0.161386	0.16051	0.160451	0.159421	0.157948	0.158036	0.160481	0.162705	0.161879	0.160404	0.160733	0.161568	0.161766	0.162652	0.163466	0.162294	0.160003	0.158411	0.15799	0.158948	0.161893	0.164964	0.165756
46	Fiber average	0.167596	0.168164	0.168247	0.167414	0.166954	0.167453	0.167729	0.167565	0.167598	0.167663	0.167934	0.168429	0.168984	0.169553	0.169491	0.168963	0.168915	0.169502	0.169433	0.168745	0.168355	0.168119	0.169053	0.171464	0.172753	0.171743	0.171013	0.17082	0.169464	0.167856	0.16797	0.170486	0.172789	0.171945	0.170396	0.17081	0.171751	0.171943	0.172882	0.173671	0.17231	0.169841	0.168193	0.16788	0.169055	0.172432	0.176092	0.177057
47	Fiber average	0.110446	0.111037	0.111125	0.110387	0.114092	0.114346	0.110381	0.110483	0.110844	0.111037	0.111177	0.111533	0.112017	0.112544	0.112411	0.11178	0.111759	0.112565	0.112689	0.112027	0.111651	0.111568	0.11274	0.115406	0.116675	0.115353	0.114584	0.114299	0.112547	0.110873	0.111385	0.114591	0.117509	0.116569	0.114736	0.115261	0.116141	0.116051	0.117136	0.117945	0.115944	0.112948	0.111146	0.110968	0.112964	0.117907	0.122385	0.122812
48	Fiber average	0.00564556	0.00628667	0.0063063	0.00580192	0.00538192	0.00569308	0.00588923	0.00588462	0.00613692	0.00630615	0.00652038	0.00698962	0.00738852	0.00803	0.00780222	0.0069137	0.00684704	0.0078363	0.0079363	0.00702778	0.00657778	0.00669074	0.00798704	0.0105863	0.011843	0.0105563	0.0097537	0.00944222	0.00775741	0.0061163	0.00660481	0.00989704	0.0129111	0.0118596	0.0100156	0.010693	0.0113652	0.0108804	0.0120511	0.0133337	0.0114474	0.00815667	0.0061537	0.006405	0.00862296	0.0140396	0.0187019	0.0190581
49	Fiber average	0.0037084	0.00419577	0.00419385	0.0034752	0.00319304	0.00309923	0.00347846	0.00365692	0.00388462	0.00390462	0.00407308	0.00449185	0.00521222	0.00573481	0.00532926	0.00468692	0.00474346	0.00544148	0.00538741	0.00445	0.00390741	0.00385667	0.00513852	0.00795519	0.00943407	0.00821148	0.00733074	0.00692593	0.00527111	0.00362852	0.00411037	0.00754963	0.0107337	0.00976556	0.00779111	0.00806963	0.00865	0.0085263	0.0097363	0.0106322	0.00861704	0.00552185	0.00391692	0.00385704	0.00622444	0.0113937	0.0159941	0.0166011
50	Fiber average	0.00518769	0.00561778	0.00555519	0.0049848	0.0044752	0.00468038	0.00470741	0.00460222	0.00489296	0.00521111	0.00545667	0.0058963	0.00646704	0.00693778	0.00664407	0.00600185	0.00616704	0.00702407	0.00689593	0.00582556	0.00516889	0.00515	0.00649593	0.00918778	0.0104996	0.00928333	0.00856667	0.00844148	0.00687481	0.00513444	0.00537074	0.00834963	0.0112489	0.0103711	0.00841407	0.00864222	0.00943333	0.00945815	0.0105715	0.0115822	0.00999222	0.00726148	0.00553148	0.00522556	0.00690333	0.0114585	0.0158707	0.0164815
51	Fiber average	0.00358731	0.00423615	0.00418615	0.00348	0.00312136	0.00336957	0.00364565	0.0033768	0.0037144	0.0039692	0.00406538	0.00449885	0.00487667	0.00555593	0.00553222	0.00502538	0.00481462	0.00516667	0.0051963	0.00478885	0.00449538	0.00441269	0.00513704	0.00737704	0.00858889	0.00755963	0.00684778	0.00656481	0.00506296	0.00366923	0.00392	0.00675185	0.00921037	0.00837111	0.00696185	0.00736889	0.0078063	0.00758519	0.00859185	0.00954074	0.00810889	0.00551963	0.00408769	0.00403962	0.00558926	0.00957222	0.0132267	0.0138148
52	Fiber average	0.0125985	0.0130715	0.0129915	0.0120704	0.0117211	0.0122596	0.0123256	0.0120004	0.0122441	0.0125337	0.0127137	0.0131541	0.0138159	0.0144156	0.0142741	0.013683	0.0136063	0.0141381	0.013987	0.0132078	0.0128596	0.0127589	0.0136178	0.0159344	0.0172622	0.0161126	0.0152507	0.0151937	0.0139967	0.0124193	0.0125663	0.0152348	0.0177763	0.0170807	0.0155911	0.0158648	0.0163507	0.0161963	0.0171063	0.0180111	0.0167659	0.0143867	0.0127848	0.0124641	0.0136507	0.0170559	0.0206693	0.0216822
53	Fiber average	0.0130622	0.0134467	0.013397	0.0125441	0.0119904	0.0123637	0.0126493	0.0126356	0.0129863	0.0133304	0.0135222	0.0137559	0.0142119	0.0148067	0.0146767	0.0140507	0.0140359	0.0146744	0.0146219	0.0139537	0.0135667	0.0133307	0.0141222	0.01628	0.0174848	0.0164463	0.0156437	0.0155011	0.0142941	0.01284	0.0129793	0.0154659	0.0179637	0.017323	0.0158193	0.0161281	0.0167696	0.0167437	0.0176296	0.0184404	0.0172041	0.0149411	0.0134481	0.0130593	0.0140093	0.0172274	0.020883	0.0219667
54	Fiber average	0.0110856	0.0117496	0.0117993	0.0108407	0.0103063	0.0108367	0.0112204	0.0112848	0.0116081	0.0117926	0.011837	0.0120596	0.0126778	0.013423	0.0132307	0.0124593	0.0124185	0.0130885	0.0130041	0.0122926	0.0119544	0.0117733	0.0125607	0.0147563	0.016057	0.0150859	0.014173	0.0138644	0.0126959	0.0113867	0.0116281	0.0139319	0.0159785	0.0152096	0.0138826	0.0142996	0.0149744	0.0149581	0.0158826	0.0168696	0.0157811	0.0134478	0.0117689	0.0113448	0.012423	0.0156048	0.018857	0.0197593
55	Fiber average	0.000996667	0.00150333	0.001295	0.00091	0.00021	0.00085875	0.00146364	0.00156818	0.00151833	0.001176	0.0007875	0.00145333	0.00127	0.0009825	0.00097	0.00167	0.00137	0.001035	0.0007225	0.00065	0.00042	0.000505	0.00189	0.000974286	0.00121	0.0011375	0.0011025	0.000813333	0.00052	0.00019		0.00056	0.001166	0.00222667	0.00203333	0.001235	0.00066		0.00065	0.001652	0.00167333	0.001765	0.00161	0.0006825	0.00045	0.000515	0.00108444	0.00128143
56	Fiber average	0.00419	0.00220667	0.00236	0.00324	0.00390333	0.00409333	0.00305	0.00166571	0.00158	0.00131	0.00176	0.0029925	0.002165	0.0017825	0.00397	0.002145	0.00165333	0.001015	0.00265	0.00378	0.00373	0.00284	0.002335	0.00311667	0.00285	0.003105	0.00259	0.00313	0.0024	0.00362	0.00175333	0.002285	0.002125	0.00125	0.00246667	0.0022675	0.001955	0.00382	0.00278333	0.00175429	0.00206571	0.00143667	0.00291	0.002635	0.001625	0.000996667	0.00136	0.001866
57	Fiber average	0.00163143	0.00196111	0.00201692	0.00182083	0.001452	0.00172286	0.00283438	0.00287105	0.00204444	0.00218556	0.00272167	0.00190182	0.00290182	0.00224909	0.000953636	0.00131375	0.00171727	0.00217091	0.002072	0.0015	0.001556	0.00128	0.001251	0.00226615	0.00188083	0.00168222	0.00179	0.00126625	0.00108	0.0008575	0.001242	0.00157143	0.00187929	0.00236562	0.00226714	0.002109	0.00192286	0.0014075	0.001606	0.00249214	0.00243933	0.00151231	0.00114778	0.0014075	0.0019025	0.00218182	0.00322385	0.00278357
58	Fiber average	0.00488565	0.00511542	0.0053876	0.00528833	0.00506652	0.0052676	0.00597885	0.00611346	0.00532462	0.00438115	0.004246	0.0049588	0.00521769	0.00428462	0.00407864	0.00409261	0.00496261	0.00573545	0.0045908	0.00393957	0.00297913	0.0033775	0.00458636	0.0057792	0.00557269	0.005146	0.0051096	0.00468625	0.00420714	0.00390955	0.0041475	0.0051612	0.00703042	0.00718542	0.00632167	0.00548375	0.00462542	0.00443522	0.0045548	0.00572731	0.00601692	0.00497154	0.0045712	0.00454038	0.0050732	0.006226	0.00707308	0.00632852
59	Fiber average	0.00290882	0.003174	0.00395619	0.00371286	0.00350278	0.00382421	0.00400458	0.00426708	0.00366091	0.00329684	0.00314579	0.0032187	0.00382522	0.0036945	0.00299105	0.00331444	0.00377842	0.00375095	0.0035645	0.00289944	0.00275769	0.00271857	0.00380412	0.00510105	0.00524263	0.00483667	0.00538562	0.00463625	0.00307875	0.00369636	0.00388417	0.00410765	0.00475364	0.00469087	0.00433955	0.00410955	0.00363682	0.0034925	0.003967	0.00481783	0.00479435	0.0038425	0.00342833	0.00356526	0.00372565	0.00550217	0.00696783	0.005594
60	Fiber average	0.00425808	0.00478074	0.00555333	0.0055252	0.00441962	0.00480346	0.00591704	0.00655444	0.00597308	0.00478923	0.0045932	0.00516962	0.00573808	0.00488385	0.00389115	0.00387231	0.00427037	0.00490815	0.00495519	0.0047516	0.00422696	0.0038175	0.0052512	0.00692192	0.00667192	0.00533667	0.00513704	0.00459577	0.00408261	0.0040425	0.0046524	0.00587846	0.00745963	0.00742926	0.00632185	0.00572259	0.00535407	0.00498815	0.00533074	0.00671185	0.00702889	0.00600731	0.00502654	0.0050036	0.00513407	0.00709148	0.00895667	0.00910462
[truncated: 1,505 more columns]
